# Supplementary material
Source: publisher site journal article supplement (https://www.dovepress.com/get_supplementary_file.php?f=361039.docx)
Supplement: Supplementary file 1 [file get_supplementary_file.php]

**Supplementary Material**

**Supplementary Figure**

Supplementary Fig. 1

**
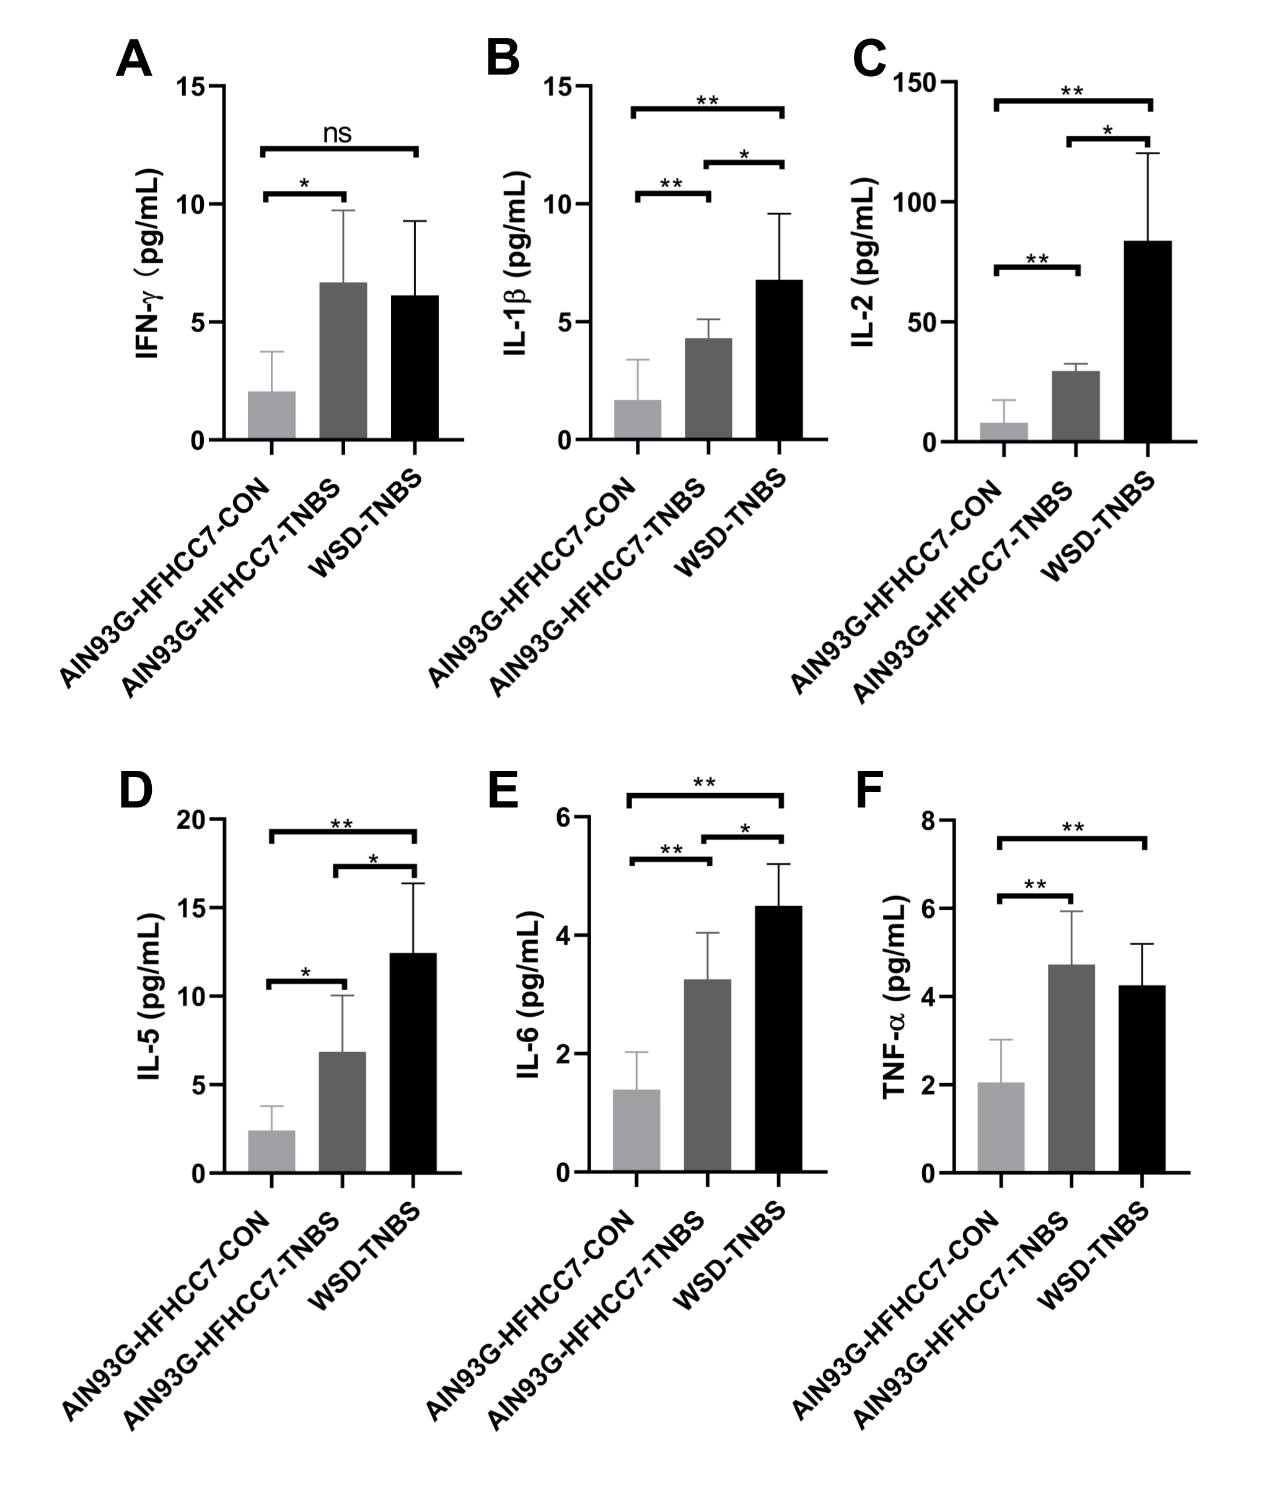
**

Supplementary Fig. 2

**
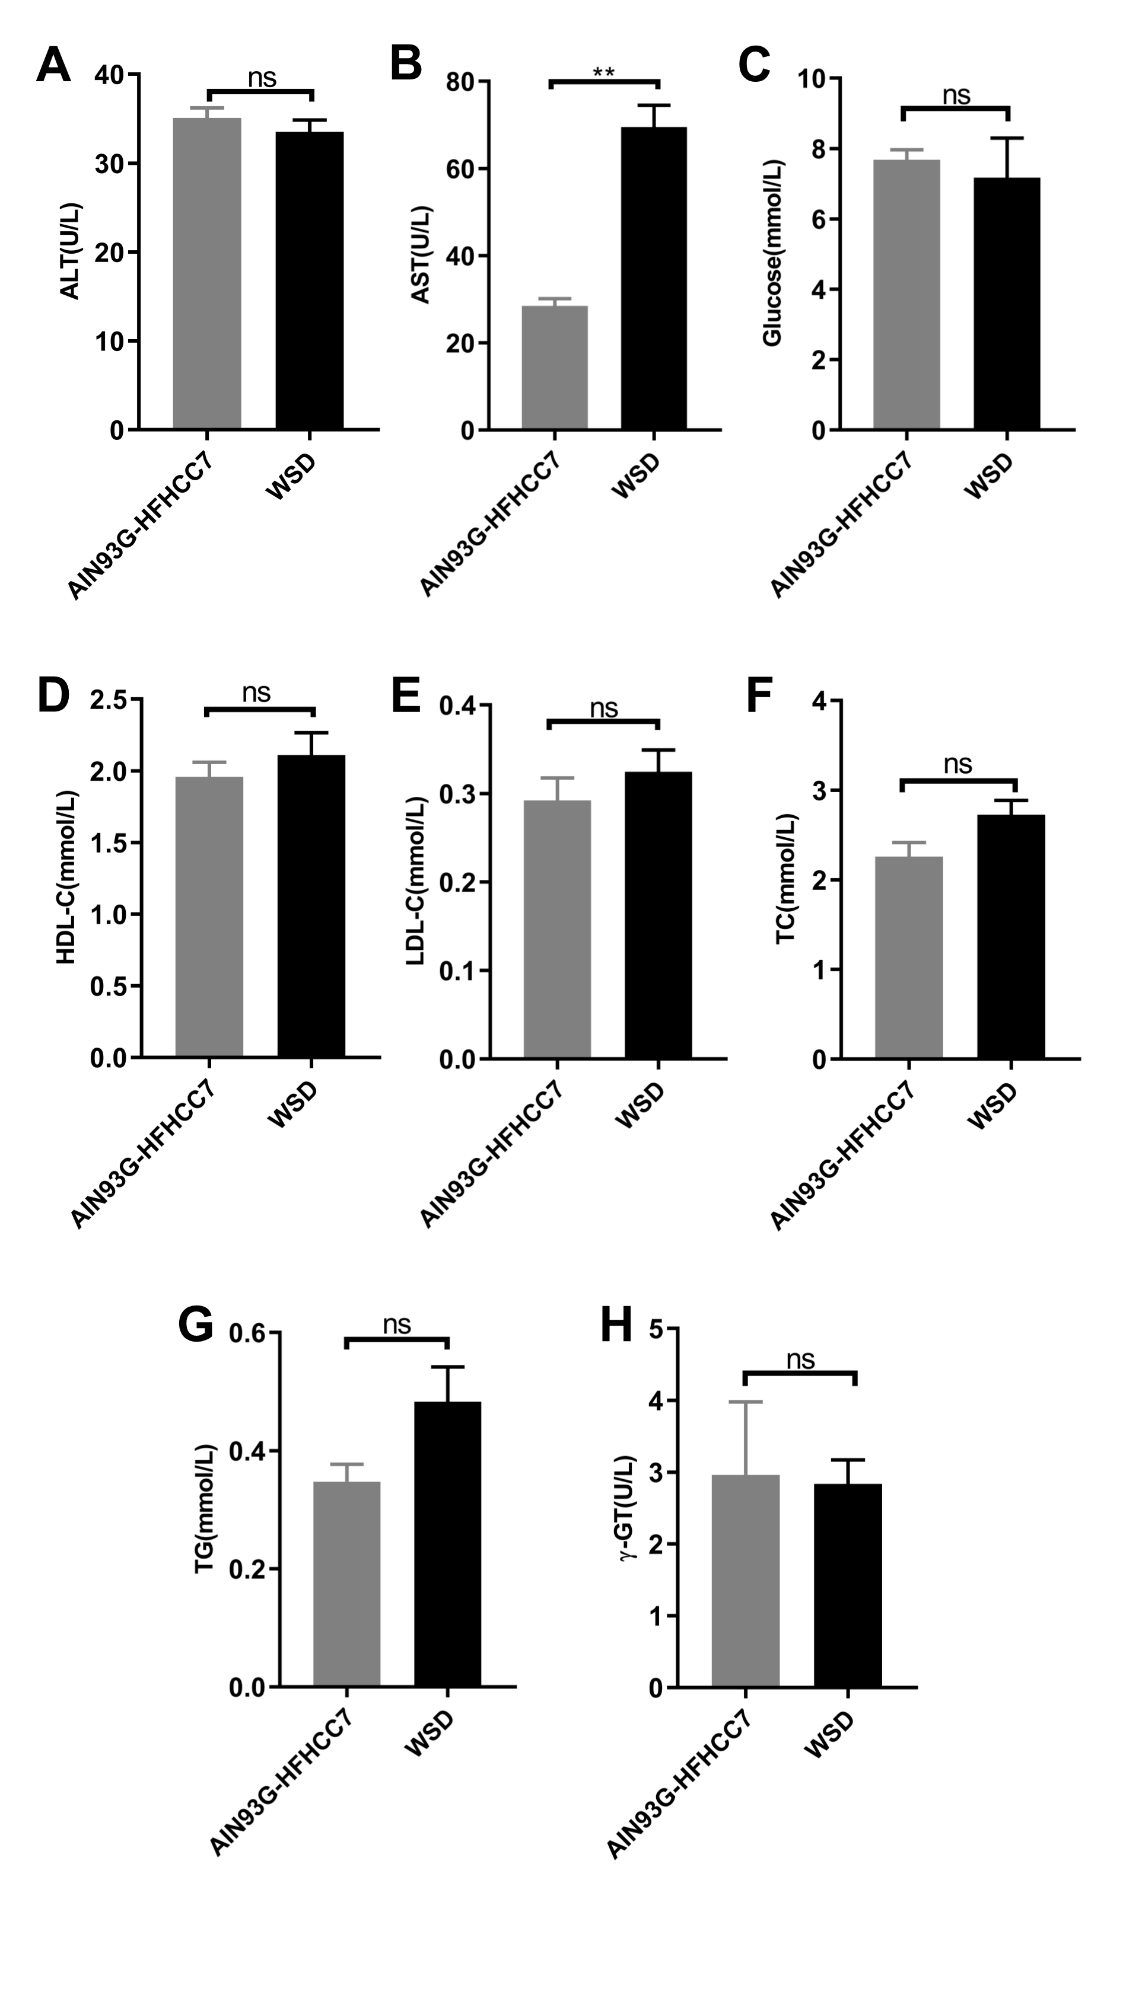
**

**Supplementary Figure Legends**

Supplementary Fig. 1 Pro-inflammatory cytokines comparison in serum of the AIN93G-HFHCC7-CON group (n=7), AIN93G-HFHCC7-TNBS group (n=8) and WSD-TNBS group (n=10). IFN-γ (A), IL-1β (B), IL-2 (C), IL-5 (D), IL-6 (E), TNF-α (F). ns=*P* > 0.05, *=*P* < 0.05, **=*P* < 0.01.

Supplementary Fig. 2 Biochemical indexes comparison in serum of the AIN93G-HFHCC7 group (n=6) and WSD-TNBS group (n=6). ALT (A), AST(B), Glucose (C), HDL-c (D), LDL-c (E), TC (F), TG (G), γ-GT (H). ns=*P* > 0.05, **=*P* < 0.01.

**Supplementary Table**

Supplementary Table 1 Ingredient of Mice Chow

| Ingredient | HFHC | | | HFHC-C7 | | | AIN93G | | |
| --- | --- | --- | --- | --- | --- | --- | --- | --- | --- |
| kcal/g | gram | kcal | kcal/g | gram | kcal | kcal/g | gram | kcal |
| Caisein | 4 | 195 | 780 | 4 | 195 | 780 | 4 | 200 | 800 |
| L-Cystine | 0 | 0 | 0 | 0 | 0 | 0 | 4 | 3 | 12 |
| DL-Methionine | 4 | 3 | 12 | 4 | 3 | 12 | 0 | 0 | 0 |
| Sucrose | 4 | 341 | 1364 | 4 | 0 | 0 | 4 | 100 | 400 |
| Cornstarch | 4 | 150 | 600 | 4 | 695.4 | 2782 | 4 | 397.5 | 1590 |
| Dyetrose | 0 | 0 | 0 | 0 | 0 | 0 | 4 | 132 | 528 |
| Soybean oil | 0 | 0 | 0 | 0 | 0 | 0 | 9 | 70 | 630 |
| Corn oil | 0 | 0 | 0 | 9 | 52.5 | 472 | 0 | 0 | 0 |
| Maltodextrin 10 | 0 | 0 | 0 | 4 | 150 | 600 | 0 | 0 | 0 |
| Milkfat | 9 | 210 | 1890 | 9 | 0 | 0 | 0 | 0 | 0 |
| Ethoxyquin | 0 | 0.04 | 0 | 0 | 0.04 | 0 | 0 | 0 | 0 |
| Cellulose | 0 | 50 | 0 | 0 | 50 | 0 | 0 | 50 | 0 |
| Mineral Mix #200000 | 0 | 35 | 0 | 0 | 35 | 0 | 0 | 0 | 0 |
| Mineral Mix #210025 | 0 | 0 | 0 | 0 | 0 | 0 | 0 | 35 | 0 |
| Calcium Carbonate | 0 | 4 | 0 | 0 | 4 | 0 | 0 | 0 | 0 |
| Vitamin Mix #300050 | 4 | 10 | 40 | 4 | 10 | 40 | 0 | 0 | 0 |
| Vitamin Mix #310025 | 0 | 0 | 0 | 0 | 0 | 0 | 4 | 10 | 40 |
| Choline bitartrate | 0 | 2 | 0 | 0 | 2 | 0 | 0 | 2.5 | 0 |
| Cholesterol | 0 | 1.5 | 0 | 0 | 0 | 0 | 0 | 0 | 0 |
| Red dye | 0 | 0 | 0 | 0 | 0.05 | 0 | 0 | 0 | 0 |
| Yellow dye | 0 | 0.05 | 0 | 0 | 0.05 | 0 | 0 | 0 | 0 |
| Total | / | 1001.6 | 4686 | / | 1197.04 | 4686 | / | 1000 | 4000 |

Supplementary Table 2 Scoring System for Inflammation-associated Histopathological Changes in 2,4,6-trinitro-benzene sulfonic acid (TNBS)-induced Colitis

| Score | Histologic Changes in TNBS colitis |
| --- | --- |
| 0 | No evidence of inflammation |
| 1 | Low level of inflammation, with scattered infiltrating mononuclear cells (1-2 foci) |
| 2 | Moderate inflammation, with multiple foci |
| 3 | High level of inflammation, with increased vascular density and marked wall thickening |
| 4 | Maximal severity of inflammation, with transmural leukocyte infiltration and loss of goblet cells |

Supplementary Table 3 Histopathological Scoring System of Small Intestine

| Score | Small intestine microscopic findings |
| --- | --- |
| 0 | Normal histological findings |
| 1 | Villus blunting, loss of crypt architecture, sparse inflammatory cell infiltration, vacuolization and edema |
| 2 | Villus blunting with fattened and vacuolated cells, crypt necrosis, intense inflammatory cell infiltration, vacuolization and edema |
| 3 | Mucosa: villus blunting with fattened and vacuolated cells, crypt necrosis, intense inflammatory cell infiltration, vacuolization and edema.  Muscular: edema, vacuolization, sparse neutrophil infiltration |

Supplementary Table 4 Hepatic Histopathological Evaluation

| Item | Score | Finding |
| --- | --- | --- |
| Steatosis | 0 | No fat |
|  | 1 | Steatosis occupying < 33% of the hepatic parenchyma |
|  | 2 | 34-66% of the hepatic parenchyma |
|  | 3 | More than 66% of the hepatic parenchyma |
| Inflammation | 0 | None |
|  | 1 | 1-2 foci per 200 x field |
|  | 2 | 3-4 foci per 200 x field |
|  | 3 | More than 4 foci per 200 x field |
| Ballooning | 0 | None |
|  | 1 | Few balloon cells |
|  | 2 | Many cells / prominent ballooning |
| Fibrosis | 0 | None |
|  | 1 | Mild, perisinusoidal or periportal |
|  | 2 | Moderate, perisinusoidal or periportal |
|  | 3 | Bridging fibrosis |
|  | 4 | cirrhosis |

Supplementary Table 5 Differentially Expressed Gene KEGG Pathways between the WSD-TNBS Group and the AIN93G-HFHCC7-TNBS Group

| Pathway ID | Pathway | Number of Involved Genes | Upregulation/Downregulation | *P* Value |
| --- | --- | --- | --- | --- |
| mmu05412 | Arrhythmogenic right ventricular cardiomyopathy (ARVC) | 22 | Up | 1.3E-08 |
| mmu05414 | Dilated cardiomyopathy (DCM) | 23 | Up | 2.0E-07 |
| mmu04390 | Hippo signaling pathway | 32 | Up | 2.2E-07 |
| mmu04310 | Wnt signaling pathway | 29 | Up | 2.9E-06 |
| mmu05410 | Hypertrophic cardiomyopathy (HCM) | 20 | Up | 4.9E-06 |
| mmu05217 | Basal cell carcinoma | 15 | Up | 7.5E-05 |
| mmu04340 | Hedgehog signaling pathway | 12 | Up | 9.6E-05 |
| mmu04360 | Axon guidance | 28 | Up | 2.0E-04 |
| mmu05226 | Gastric cancer | 25 | Up | 2.2E-04 |
| mmu05205 | Proteoglycans in cancer | 31 | Up | 2.4E-04 |
| mmu04916 | Melanogenesis | 18 | Up | 6.5E-04 |
| mmu04261 | Adrenergic signaling in cardiomyocytes | 23 | Up | 9.8E-04 |
| mmu04520 | Adherens junction | 14 | Up | 1.2E-03 |
| mmu05200 | Pathways in cancer | 61 | Up | 1.2E-03 |
| mmu05032 | Morphine addiction | 16 | Up | 1.9E-03 |
| mmu04350 | TGF-beta signaling pathway | 15 | Up | 1.9E-03 |
| mmu05224 | Breast cancer | 22 | Up | 2.3E-03 |
| mmu04392 | Hippo signaling pathway - multiple species | 7 | Up | 3.0E-03 |
| mmu00920 | Sulfur metabolism | 4 | Up | 3.4E-03 |
| mmu04931 | Insulin resistance | 17 | Up | 4.5E-03 |
| mmu04512 | ECM-receptor interaction | 14 | Up | 4.7E-03 |
| mmu04550 | Signaling pathways regulating pluripotency of stem cells | 20 | Up | 4.7E-03 |
| mmu04024 | cAMP signaling pathway | 26 | Up | 5.6E-03 |
| mmu04911 | Insulin secretion | 14 | Up | 5.8E-03 |
| mmu05225 | Hepatocellular carcinoma | 23 | Up | 7.1E-03 |
| mmu04010 | MAPK signaling pathway | 35 | Up | 7.8E-03 |
| mmu04934 | Cushing syndrome | 21 | Up | 1.1E-02 |
| mmu04270 | Vascular smooth muscle contraction | 18 | Up | 1.1E-02 |
| mmu04260 | Cardiac muscle contraction | 12 | Up | 1.7E-02 |
| mmu04727 | GABAergic synapse | 13 | Up | 1.9E-02 |
| mmu04928 | Parathyroid hormone synthesis, secretion and action | 15 | Up | 1.9E-02 |
| mmu00512 | Mucin type O-glycan biosynthesis | 6 | Up | 1.9E-02 |
| mmu04022 | cGMP-PKG signaling pathway | 21 | Up | 2.1E-02 |
| mmu04933 | AGE-RAGE signaling pathway in diabetic complications | 14 | Up | 2.3E-02 |
| mmu05142 | Chagas disease (American trypanosomiasis) | 14 | Up | 2.5E-02 |
| mmu04071 | Sphingolipid signaling pathway | 16 | Up | 2.8E-02 |
| mmu02010 | ABC transporters | 8 | Up | 2.8E-02 |
| mmu04921 | Oxytocin signaling pathway | 19 | Up | 2.9E-02 |
| mmu04020 | Calcium signaling pathway | 22 | Up | 2.9E-02 |
| mmu04725 | Cholinergic synapse | 15 | Up | 2.9E-02 |
| mmu04724 | Glutamatergic synapse | 15 | Up | 3.1E-02 |
| mmu04728 | Dopaminergic synapse | 17 | Up | 3.4E-02 |
| mmu04380 | Osteoclast differentiation | 16 | Up | 3.4E-02 |
| mmu05140 | Leishmaniasis | 10 | Up | 3.4E-02 |
| mmu04979 | Cholesterol metabolism | 8 | Up | 3.5E-02 |
| mmu04510 | Focal adhesion | 23 | Up | 3.7E-02 |
| mmu05210 | Colorectal cancer | 12 | Up | 4.0E-02 |
| mmu04713 | Circadian entrainment | 13 | Up | 4.1E-02 |
| mmu04151 | PI3K-Akt signaling pathway | 37 | Up | 4.7E-02 |
| mmu04976 | Bile secretion | 10 | Up | 4.8E-02 |
| mmu04926 | Relaxin signaling pathway | 16 | Up | 4.9E-02 |
| mmu00430 | Taurine and hypotaurine metabolism | 3 | Up | 4.9E-02 |
| mmu04740 | Olfactory transduction | 167 | Down | 3.1E-15 |
| mmu05204 | Chemical carcinogenesis | 31 | Down | 1.1E-11 |
| mmu00980 | Metabolism of xenobiotics by cytochrome P450 | 22 | Down | 8.8E-09 |
| mmu00982 | Drug metabolism - cytochrome P450 | 21 | Down | 8.7E-08 |
| mmu00830 | Retinol metabolism | 23 | Down | 1.2E-06 |
| mmu00983 | Drug metabolism - other enzymes | 21 | Down | 7.5E-06 |
| mmu00140 | Steroid hormone biosynthesis | 20 | Down | 2.7E-05 |
| mmu00040 | Pentose and glucuronate interconversions | 11 | Down | 6.7E-05 |
| mmu00053 | Ascorbate and aldarate metabolism | 9 | Down | 2.4E-04 |
| mmu00790 | Folate biosynthesis | 8 | Down | 9.7E-04 |
| mmu00380 | Tryptophan metabolism | 11 | Down | 1.2E-03 |
| mmu04080 | Neuroactive ligand-receptor interaction | 38 | Down | 3.8E-03 |
| mmu05332 | Graft-versus-host disease | 12 | Down | 5.7E-03 |
| mmu00480 | Glutathione metabolism | 12 | Down | 6.5E-03 |
| mmu05320 | Autoimmune thyroid disease | 13 | Down | 1.2E-02 |
| mmu05168 | Herpes simplex infection | 28 | Down | 1.2E-02 |
| mmu04726 | Serotonergic synapse | 19 | Down | 1.5E-02 |
| mmu00860 | Porphyrin and chlorophyll metabolism | 8 | Down | 1.9E-02 |
| mmu00591 | Linoleic acid metabolism | 9 | Down | 2.2E-02 |
| mmu04950 | Maturity onset diabetes of the young | 6 | Down | 2.2E-02 |
| mmu04514 | Cell adhesion molecules (CAMs) | 22 | Down | 2.4E-02 |
| mmu01524 | Platinum drug resistance | 12 | Down | 2.7E-02 |
| mmu05330 | Allograft rejection | 10 | Down | 3.3E-02 |
| mmu04612 | Antigen processing and presentation | 13 | Down | 3.5E-02 |
| mmu04146 | Peroxisome | 12 | Down | 4.8E-02 |
| mmu00910 | Nitrogen metabolism | 4 | Down | 4.9E-02 |

Pathway ID stands for Pathway identifiers used in KEGG.

When the WSD-TNBS group was compared to the AIN93G-HFHCC7-TNBS group, the later was the control group.

Supplementary Table 6 Metabolites Differentially Expressed in the Colonic Tissue between the WSD-TNBS Group and the AIN93G-HFHCC7-TNBS Group

| Metabolite | Involved Pathway ID | ESI Ion Mode | Formula | CAS ID | Fold Change |
| --- | --- | --- | --- | --- | --- |
| Aldosterone | mmu00140,01100,04925,04960,07225 | Negative | C21H28O5 | 52-39-1 | 0.02 |
| Capric acid | mmu01100,00061 | Negative | C10H20O2 | 334-48-5 | 3.93 |
| Xanthine | mmu01100,00230,00232,01060,  01065,01110,01120 | Negative | C5H4N4O2 | 69-89-6 | 18.62 |
| cis-5-Dodecenoic acid | -- | Negative | C12H22O2 | 2430-94-6 | 6.50 |
| 4-(2-Aminophenyl)-2,4-dioxobutanoic acid | mmu01100,00380 | Negative | C10H9NO4 | 90924-76-8 | 0.10 |
| 5-Hydroxytryptophol | -- | Negative | C10H11NO2 | -- | 0.08 |
| Undecanoic acid | -- | Negative | C11H22O2 | 112-37-8 | 2.90 |
| 10,13,16-Docosatriynoic acid | -- | Negative | C22H32O2 | -- | 3.00 |
| trans-Dehydroandrosterone | mmu00140,01100,01120,00984,  04913,05200,05215 | Negative | C19H28O2 | 53-43-0 | 0.37 |
| 10-Hendecenoic acid | -- | Negative | C11H20O2 | 112-38-9 | 4.12 |
| 21:3(5Z,14Z,17Z) | -- | Negative | C21H36O2 | -- | 5.12 |
| 19-Hydroxytestosterone | mmu00140,01100 | Negative | C19H28O3 | 2126-37-6 | 2.96 |
| Lauric acid | mmu01100,00061,00333,01130 | Negative | C12H24O2 | 143-07-7 | 5.65 |
| Kynurenic acid | mmu01100,00380 | Negative | C10H7NO3 | 492-27-3 | 0.34 |
| 10-[5]-ladderane-decanoic acid | -- | Negative | C22H34O2 | -- | 0.18 |
| Uridine monophosphate (UMP) | mmu01100,00240 | Negative | C9H13N2O9P | 58-97-9 | 16.00 |
| 5Z,7E,9E,14Z,17Z-eicosapentaenoic acid | mmu04750 | Negative | C20H30O2 | -- | 16.00 |
| 7-octenoic acid | -- | Positive | C8H14O2 | -- | 0.17 |
| Biliverdin | mmu00860,00110,01110 | Positive | C33H34N4O6 | -- | 5.83 |
| 5-trans-PGE2 | -- | Positive | C20H32O5 | -- | 0.32 |
| Riboflavin (Vitamin B2) | mmu01100,01110,00740,04977 | Positive | C17H20N4O6 | 83-88-5 | 0.47 |
| Sphinganine | mmu01100,00600,04071 | Positive | C18H39NO2 | 764-22-7 | 4.73 |
| 1,2-Dehydroreticuline | mmu01100,01110,00950 | Positive | C19H22NO4 | 16202-17-8 | 0.12 |
| 5-Hydroxytryptophol | -- | Positive | C10H11NO2 | -- | 0.13 |
| 4-Trimethylammoniobutanoic acid | mmu00310,02010 | Positive | C7H16NO2 | 407-64-7 | 5.33 |
| Hypoxanthine | mmu01100,00230 | Positive | C5H4N4O | 68-94-0 | 0.35 |
| Indoleacetaldehyde | mmu01100,00380 | Positive | C10H9NO | 2591-98-2 | 0.14 |
| Norepinephrine | mmu01100,00350,02020,02024,04024,  04080,04261,04270,04540,04714,  04721,04742,04923,04924,04970 | Positive | C8H11NO3 | -- | 0.33 |
| 3-Methoxytyrosine | -- | Positive | C10H13NO4 | 7636-26-2 | 0.30 |
| 5-methyl-hexanoic acid | -- | Positive | C7H14O2 | -- | 0.00 |
| 4-(2-Aminophenyl)-2,4-dioxobutanoic acid | mmu01100,00380 | Positive | C10H9NO4 | 90924-76-8 | 0.15 |
| (25R)-3alpha,7alpha,12alpha-trihydroxy-5beta-cholestan-26-oic acid | -- | Positive | C27H46O5 | -- | 3.40 |
| 7Z, 10Z, 13Z, 16Z, 19Z-Docosapentaenoic acid | mmu01040 | Positive | C22H34O2 | 24880-45-3 | 0.24 |
| LTB4 | mmu01100,00590,03320,04726,  04750,04976,07034,04080 | Positive | C20H32O4 | 71160-24-2 | 0.30 |
| Saccharopine | mmu01100,01110,00310,00300,01130,01230 | Positive | C11H20N2O6 | 997-68-2 | 0.06 |
| L-threo-7,8-Dihydrobiopterin | -- | Positive | C9H13N5O3 | -- | 2.16 |
| Phenylacetylglycine | mmu00360 | Positive | C10H11NO3 | 500-98-1 | 0.06 |
| 18:1(13Z)(17Me) | -- | Positive | C19H36O2 | -- | 4.76 |
| 5α-Dihydrotestosterone | mmu00140,05200,05215 | Positive | C19H30O2 | 521-18-6 | 0.48 |
| 16-heptadecynoic acid | -- | Positive | C17H30O2 | -- | 0.45 |
| Sphingosine | mmu01100,00600,04071,04210,04217 | Positive | C18H37NO2 | 123-78-4 | 2.02 |

Involved pathway ID stands for Pathway identifiers used in KEGG.

CAS: Chemical Abstracts Service

CAS ID stands for compound identifiers used in CAS.

When the WSD-TNBS group was compared to the AIN93G-HFHCC7-TNBS group, the later was the control group.

Supplementary Table 7 Metabolites Differentially Expressed in the Serum between the WSD-TNBS Group and the AIN93G-HFHCC7-TNBS Group

| Metabolite | Involved Pathway ID | ESI Ion Mode | Formula | CAS ID | Fold Change |
| --- | --- | --- | --- | --- | --- |
| Acetone | mmu00072,00640,01100 | Negative | C3H6O | 67-64-1 | 2.38 |
| 5-Acetamidovalerate | mmu00310 | Negative | C7H13NO3 | 1072-10-2 | 5.68 |
| 4-Hydroxy-4-(3-pyridyl)-butanoic acid | mmu00980,05204 | Negative | C9H11NO3 | 15569-97-8 | 0.39 |
| 3R-hydroxy-butanoic acid | mmu00072,01100,00650,04024 | Negative | C4H8O3 | -- | 4.45 |
| Acetic acid | mmu00640,01100,00010,00430,00440,00534,  00620,00630,00660,00680,00720,00908,  00920,01110,01120,01130,01200,01220,  04725,04973,04974 | Negative | C2H4O2 | 64-19-7 | 7.87 |
| 11-cis-Retinol | mmu00830 | Negative | C20H30O | -- | 0.08 |
| 7-methyl-hexadecanoic acid | - | Negative | C17H34O2 | -- | 8.58 |
| 4-Hydroxyphenylpyruvic acid | mmu01100,00680,01110,01120,01130,  00130,00261,00350,00400,00401,00950,  01055,01060,01063,01210,01230 | Negative | C9H8O4 | 156-39-8 | 0.13 |
| L-3-Phenyllactic acid | mmu00360,00960,01064 | Negative | C9H10O3 | 828-01-3 | 2.22 |
| 18:1(14E) | - | Negative | C18H34O2 | -- | 7.53 |
| Succinic acid semialdehyde | mmu01100,00650,00720,01120,01200,  00350,00250,00750,00760,02024 | Negative | C4H6O3 | 692-29-5 | 5.29 |
| L-1-Pyrroline-3-hydroxy-5-carboxylate | mmu01100,00330 | Negative | C5H7NO3 | -- | 0.17 |
| (25R)-3alpha,7alpha,12alpha-trihydroxy-5beta-cholestan-26-oic acid | - | Negative | C27H46O5 | -- | 0.34 |
| 5,8-tetradecadienoic acid | - | Negative | C14H24O2 | -- | 0.19 |
| 2-Keto-6-acetamidocaproate | mmu00310 | Negative | C8H13NO4 | 59403-50-8 | 3.33 |
| L-Acetylcarnitine | - | Negative | C9H17NO4 | -- | 0.26 |
| 12-tridecynoic acid | - | Negative | C13H22O2 | -- | 0.50 |
| Butyric acid | mmu01100,00650,04973,04974 | Negative | C4H8O2 | 107-92-6 | 2.94 |
| 5-Hydroxytryptophol | - | Negative | C10H11NO2 | -- | 0.22 |
| 16-heptadecynoic acid | - | Negative | C17H30O2 | -- | 2.82 |
| 4-Methylpentanal | mmu00140 | Negative | C6H12O | 1119-16-0 | 4.13 |
| 10-Hendecenoic acid | -- | Negative | C11H20O2 | 112-38-9 | 5.14 |
| 8-nonynoic acid | -- | Negative | C9H14O2 | -- | 3.15 |
| 4-acetamidobutanoate | mmu01100,00330 | Negative | C6H11NO3 | 3025-96-5 | 4.67 |
| 13:0(12Me,12Me) | -- | Negative | C15H30O2 | -- | 18.16 |
| 9-undecynoic acid | -- | Negative | C11H18O2 | -- | 0.14 |
| Aldosterone | mmu01100,00140,04925,04960,07225 | Negative | C21H28O5 | 52-39-1 | 8.96 |
| Linoelaidic Acid | -- | Negative | C18H32O2 | 506-21-8 | 0.27 |
| Uridine | mmu01100,00240 | Negative | C9H12N2O6 | -- | 4.28 |
| 5'-Carboxy-alpha-chromanol | -- | Negative | C19H28O4 | -- | 6.14 |
| p-Coumaric acid | mmu01100,01110,01220,00130,  00350,00950,00360,00940,01061 | Negative | C9H8O3 | 501-98-4 | 0.49 |
| LTB4 | mmu01100,00590,03320,04080,  04726,04750,04976,07034 | Negative | C20H32O4 | 71160-24-2 | 0.22 |
| 10Z-pentadecenoic acid | -- | Negative | C15H28O2 | -- | 2.30 |
| N-Acetyl-b-neuraminic acid | -- | Negative | C11H19NO9 | 489-46-3 | 4.85 |
| 8Z-tetradecenoic acid | -- | Negative | C14H26O2 | -- | 2.74 |
| Myristic acid | mmu01100,00061 | Negative | C14H28O2 | 544-63-8 | 3.40 |
| 5alpha-pregnane-3,20-dione | -- | Negative | C21H32O2 | 566-65-4 | 7.57 |
| Phenylacetylglycine | mmu00360 | Negative | C10H11NO3 | 500-98-1 | 0.09 |
| 11-cis-Retinaldehyde | mmu01100,00830,04744 | Negative | C20H8O | 564-87-4 | 0.00 |
| 3-Acetamidopropanal | -- | Positive | C5H9NO2 | -- | 0.23 |
| 7-octenoic acid | -- | Positive | C8H14O2 | -- | 0.23 |
| PA(22:6(4Z,7Z,10Z,13Z,16Z,19Z)/0:0) | -- | Positive | C25H39O7P | -- | 3.54 |
| (25R)-5beta-cholestane-3alpha,7alpha,12alpha,26-tetrol | -- | Positive | C27H48O4 | -- | 3.73 |
| Biliverdin | mmu00860,01100,01110 | Positive | C33H34N4O6 | -- | 3.99 |
| Picolinic acid | mmu01100,00380 | Positive | C6H5NO2 | 14639-25-9 | 4.15 |
| Normetanephrine | mmu01100,00350 | Positive | C9H13NO3 | 97-31-4 | 3.98 |
| L-Cystathionine | mmu01100,01110,00260,00270,01130,01230 | Positive | C7H14N2O4S | 56-88-2 | 0.31 |
| Glycine | mmu00860,01100,01110,00260,01130,  01230,00120,00230,00310,00440,  00460,00480,00630,00680,00730,  00970,01060,01120,01200,01502,  02010,02026,04080,04721,04974,  04978,05230 | Positive | C2H5NO2 | 56-40-6 | 16.00 |
| L-Thyronine | -- | Positive | C15H15NO4 | 1596-67-4 | 7.40 |
| 5,8,11,14-Eicosatetraynoic acid | -- | Positive | C20H24O2 | -- | 63.34 |
| Acetylcarnitine | mmu04931 | Positive | C9H18NO4 | 5080-50-2 | 0.33 |
| (R)-Hydnocarpic acid | -- | Positive | C16H28O2 | 459-67-6 | 7.05 |
| Vanilpyruvic acid | -- | Positive | C10H10O5 | 1081-71-6 | 4.60 |
| Nicotine imine | -- | Positive | C10H13N2 | -- | 16.00 |
| Alpha-CEHC | -- | Positive | C16H22O4 | 4072-32-6 | 7573.26 |
| 10,13,16-Docosatriynoic acid | -- | Positive | C22H32O2 | -- | 0.06 |

Involved pathway ID stands for Pathway identifiers used in KEGG.

CAS: Chemical Abstracts Service

CAS ID stands for compound identifiers used in CAS.

When the WSD-TNBS group was compared to the AIN93G-HFHCC7-TNBS group, the later was the control group.

Supplementary Table 8 Pearson correlation analysis of differential genes and metabolites in the comparison of the WSD-TNBS group and AIN93G-HFHCC7-TNBS group

| Gene | Metabolite | Pearson correlation coefficient | *P* value |
| --- | --- | --- | --- |
| Differential genes and metabolites in colonic tissue | | | |
| Cyp11b1 | Aldosterone | -0.903 | 2.101E-03 |
| Cyp11b1 | 5Z,7E,9E,14Z,17Z-eicosapentaenoic acid | 0.927 | 9.162E-04 |
| Cyp11b1 | Phenylacetylglycine | -0.857 | 6.508E-03 |
| Cyp11b1 | Saccharopine | -0.884 | 3.594E-03 |
| Srd5a3 | Aldosterone | -0.911 | 1.622E-03 |
| Srd5a3 | 5Z,7E,9E,14Z,17Z-eicosapentaenoic acid | 0.950 | 3.037E-04 |
| Srd5a3 | 19-Hydroxytestosterone | 0.923 | 1.074E-03 |
| Srd5a3 | 3-Methoxytyrosine | -0.933 | 7.220E-04 |
| Srd5a3 | Saccharopine | -0.848 | 7.848E-03 |
| Srd5a3 | Phenylacetylglycine | -0.864 | 5.702E-03 |
| Cyp1a1 | 7-octenoic acid | -0.932 | 7.570E-04 |
| Cyp1a1 | 1,2-Dehydroreticuline | -0.915 | 1.430E-03 |
| Cyp1a1 | 3-Methoxytyrosine | -0.923 | 1.061E-03 |
| Cyp1a1 | 5-trans-PGE2 | -0.902 | 2.156E-03 |
| Cyp1a1 | Sphinganine | 0.842 | 8.725E-03 |
| Hsd17b6 | 3-Methoxytyrosine | -0.928 | 8.770E-04 |
| Differential genes in colonic tissue and differential metabolites in serum | | | |
| Cyp2c70 | 5-Acetamidovalerate | 0.937 | 5.860E-04 |
| Cyp2c70 | Normetanephrine | 0.952 | 2.740E-04 |
| Cyp2c70 | Uridine | 0.947 | 3.480E-04 |
| Cyp2c70 | Vanilpyruvic acid | 0.970 | 6.820E-05 |
| Cyp2c29 | Vanilpyruvic acid | 0.959 | 1.700E-04 |
| Adh4 | L-1-Pyrroline-3-hydroxy-5-carboxylate | -0.902 | 2.174E-03 |
| Adh4 | Vanilpyruvic acid | 0.980 | 1.900E-05 |
| Adh1 | Vanilpyruvic acid | 0.921 | 1.150E-03 |
| Ugt2b35 | Vanilpyruvic acid | 0.913 | 1.532E-03 |
| Cyp3a11 | Vanilpyruvic acid | 0.936 | 6.260E-04 |
| Ugt2b5 | Acetone | 0.909 | 1.756E-03 |
| Ugt2b5 | L-3-Phenyllactic acid | 0.912 | 1.601E-03 |
| Rdh5 | Normetanephrine | 0.948 | 3.410E-04 |
| Rdh5 | 5-Acetamidovalerate | 0.956 | 2.030E-04 |
| Rdh5 | L-3-Phenyllactic acid | 0.962 | 1.280E-04 |
| Rdh5 | 2-Keto-6-acetamidocaproate | 0.933 | 7.020E-04 |
| Rdh5 | Aldosterone | 0.908 | 1.841E-03 |
| Rdh5 | Normetanephrine | 0.948 | 3.410E-04 |
| Rdh5 | Uridine | 0.944 | 4.200E-04 |
| Rdh5 | 5-Acetamidovalerate | 0.956 | 2.030E-04 |
| Ugt2b37 | L-3-Phenyllactic acid | 0.910 | 1.710E-03 |
| Ugt2b37 | 8-nonynoic acid | 0.921 | 1.146E-03 |
| Ugt2b37 | Aldosterone | 0.914 | 1.503E-03 |
| Cyp4a14 | Acetylcarnitine | -0.904 | 2.072E-03 |
| Cyp4a14 | 2-Keto-6-acetamidocaproate | 0.935 | 6.590E-04 |
| Cyp4a14 | Acetone | 0.936 | 6.370E-04 |
| Cyp4a14 | 5,8-tetradecadienoic acid | -0.901 | 2.279E-03 |
| Cyp4a14 | 3R-hydroxy-butanoic acid | 0.912 | 1.617E-03 |
| Cyp4a14 | p-Coumaric acid | -0.928 | 8.870E-04 |
| Cyp4a14 | 10-Hendecenoic acid | 0.905 | 1.963E-03 |
| Cyp4a14 | 7-methyl-hexadecanoic acid | 0.907 | 1.872E-03 |
| Hsd17b6 | 4-Hydroxyphenylpyruvic acid | -0.907 | 1.885E-03 |
| Hsd17b6 | 5,8-tetradecadienoic acid | -0.932 | 7.310E-04 |
| Hsd17b6 | 12-tridecynoic acid | -0.950 | 3.060E-04 |
| Hsd17b6 | 4-acetamidobutanoate | 0.914 | 1.496E-03 |
| Cyp1a1 | 12-tridecynoic acid | -0.917 | 1.363E-03 |
